# Supplementary material for: APC controls Wnt-induced β-catenin destruction complex recruitment in human colonocytes
Source: PubMed Central journal article supplement (PMC7031393; doi:10.1038/s41598-020-59899-z), 2020-02-19
Supplement: 41598_2020_59899_MOESM1_ESM.pdf [file 41598_2020_59899_MOESM1_ESM.pdf]

# APC controls Wnt-induced $\beta$ -catenin destruction complex recruitment in human colonocytes

Taybor W. Parker and Kristi L. Neufeld<sup>1</sup>

Department of Molecular Biosciences, University of Kansas, Lawrence, KS

<sup>1</sup>Corresponding author: Kristi L. Neufeld, 7049 Haworth Hall, 1200 Sunnyside Ave., University of Kansas, Lawrence, KS 66045; phone (785)864-5079; email: [klneuf@ku.edu](mailto:klneuf@ku.edu)

## Author Information:

Taybor W. Parker, [parkertw@ku.edu](mailto:parkertw@ku.edu), ORCID: 0000-0002-3829-7554

Kristi L. Neufeld, [klneuf@ku.edu](mailto:klneuf@ku.edu), ORCID: 0000-0003-3653-9385

## Supplemental Figure Legends

**Supplemental Figure 1. Line scan analysis of signalosome and destruction complex components in RKO cells.** Line scans were performed on RKO cells containing an intact Wnt signaling pathway using ImageJ/FIJI (NIH). Lines were drawn beginning at the Wnt- or Unloaded-bead and run across the cell nucleus. Line colors correspond to bright-field (black), DAPI (blue), and protein (red). If brightfield image was unavailable, the black line corresponds to DAPI. Line scans correspond to A) APC, B) Axin1, C)  $\beta$ -catenin, D) CK1- $\alpha$ , E) GSK-3 $\beta$ , F)  $\beta$ -TrCP, and G) FZD7. Line scans were performed on five cells per condition.

**Supplemental Figure 2. Line scan analysis of signalosome and destruction complex in HCT116 $\beta$ m cells.** Line scans were performed on HCT116 $\beta$ m cells containing stabilized  $\beta$ -catenin through Ser45 deletion. Lines were drawn beginning at the Wnt- or Unloaded-bead and run across the cell nucleus. Line colors correspond to bright-field (black), DAPI (blue), and protein (red). If brightfield image was unavailable, the black line corresponds to DAPI. Line scans correspond to A) APC, B) Axin1, C)  $\beta$ -catenin, D) CK1- $\alpha$ , E) GSK-3 $\beta$ , F)  $\beta$ -TrCP, and G) FZD7. Line scans were performed on five cells per condition.

**Supplemental Figure 3. Line scan analysis of signalosome and destruction complex in DLD1 cells.** Line scans were performed on DLD1 cells which harbor truncated APC. Lines were drawn beginning at the Wnt- or Unloaded-bead and run across the cell nucleus. Line colors correspond to bright-field (black), DAPI (blue), and protein (red). If brightfield image was unavailable, the black line corresponds to DAPI. Line scans correspond to A) APC, B) Axin1, C)  $\beta$ -catenin, D) CK1- $\alpha$ , E) GSK-3 $\beta$ , F)  $\beta$ -TrCP, and G) FZD7. Line scans were performed on five cells per condition.

**Supplemental Figure 4. HCEC 1CT images from Figure 7.** Immunofluorescent microscopy images of HCEC 1CT cells following APC, Axin1, or control siRNA treatment and Wnt-bead treatment. Images shown are individual channels of the images used in Figure 7. Immunofluorescent images of (A) APC and  $\beta$ -catenin, (B) Axin1, and (C) GSK-3 $\beta$  following siCtl and siAPC treatment. (D) Immunofluorescent images of APC and  $\beta$ -catenin following siAxin1 treatment.

Supplemental Figure 5. **Full-length western blots.** (A) Wnt-bead “pull down” assay demonstrated in Figure 3. (B) APC knock-down shown in Figure 7. (C) Axin1 knock-down shown in Figure 7. Each individual set of images are taken from the same gel/membrane.

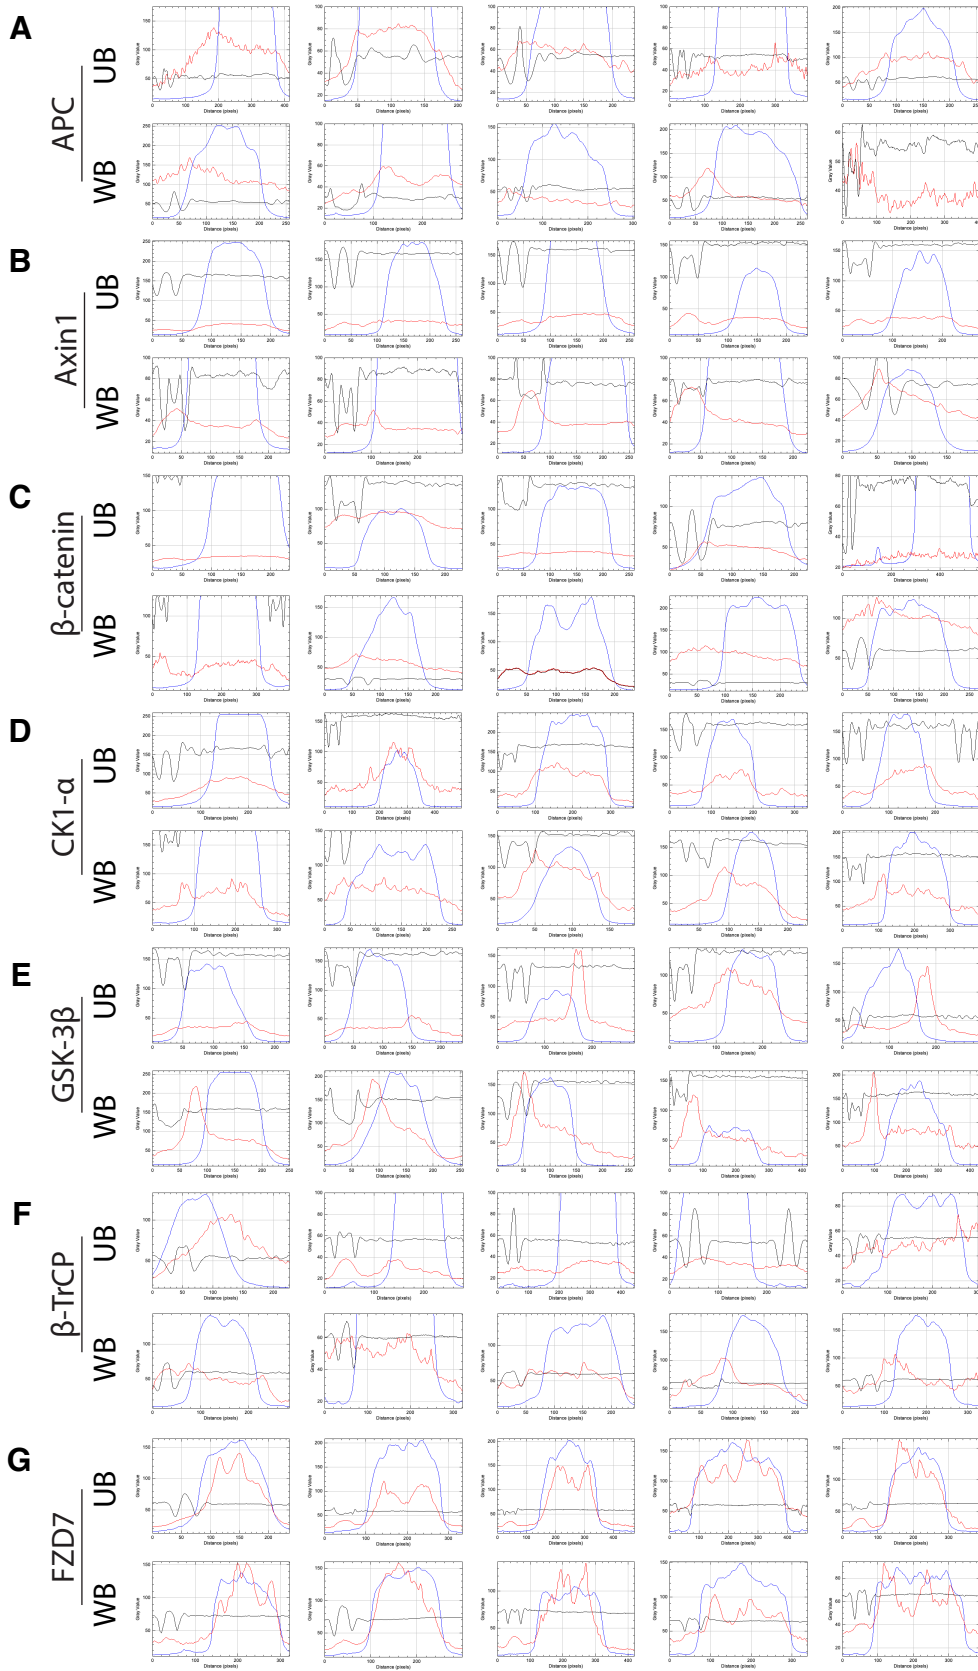

**Supplemental Fig. 1**

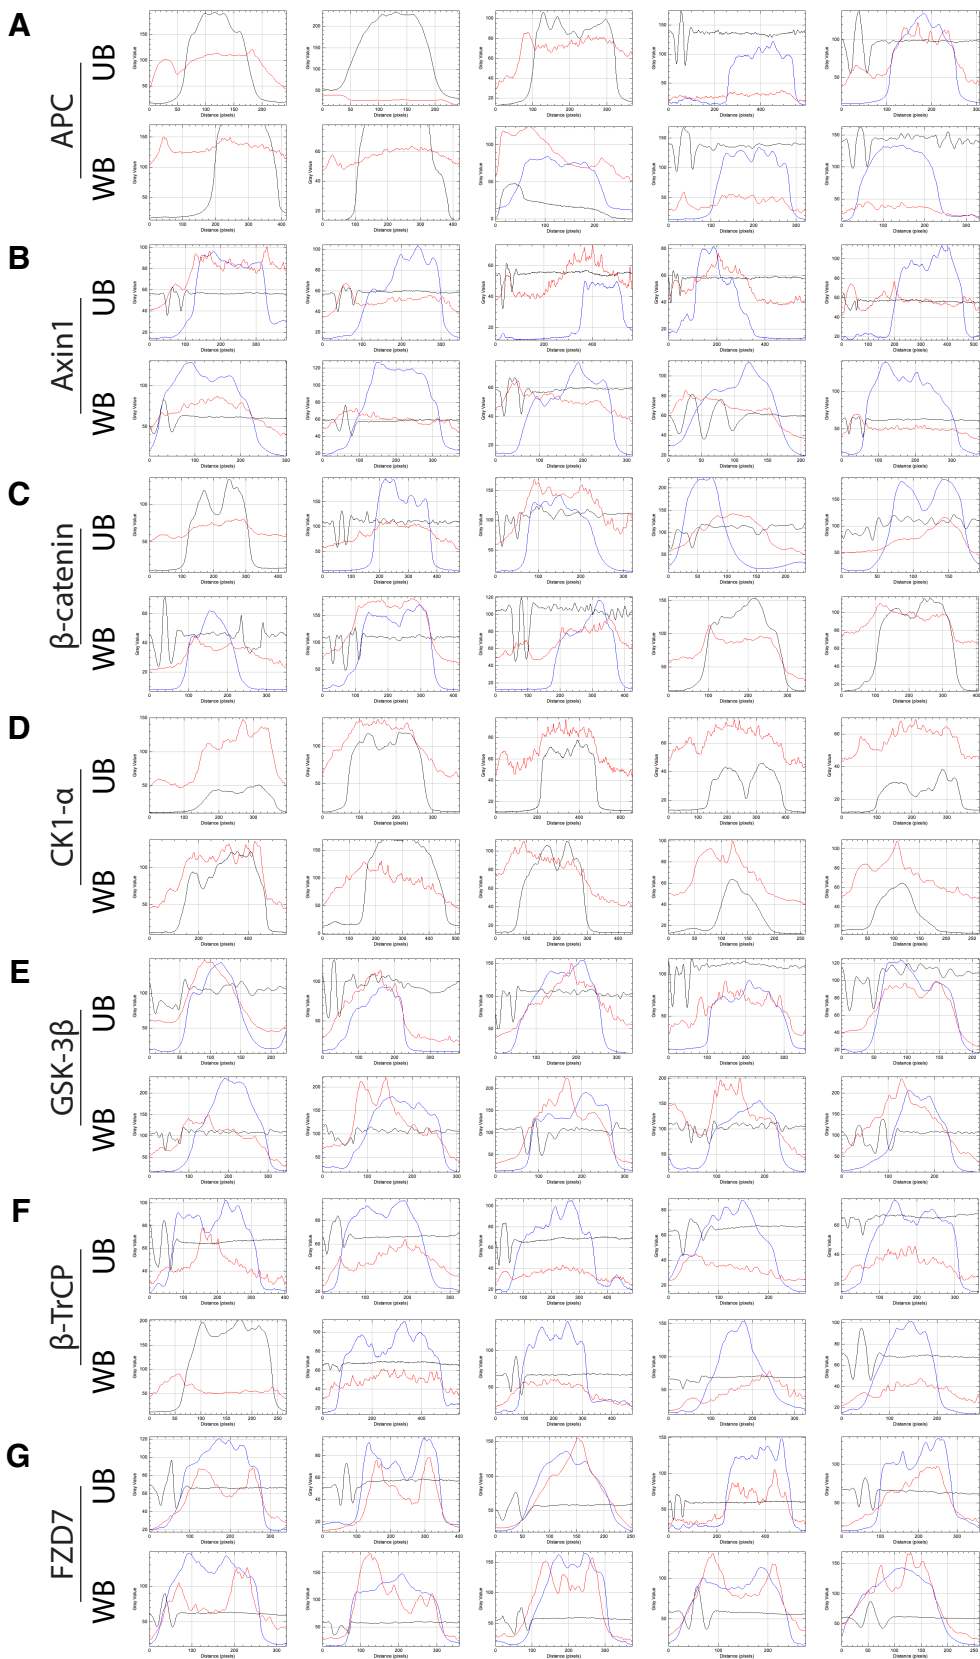

**Supplemental Fig. 2**



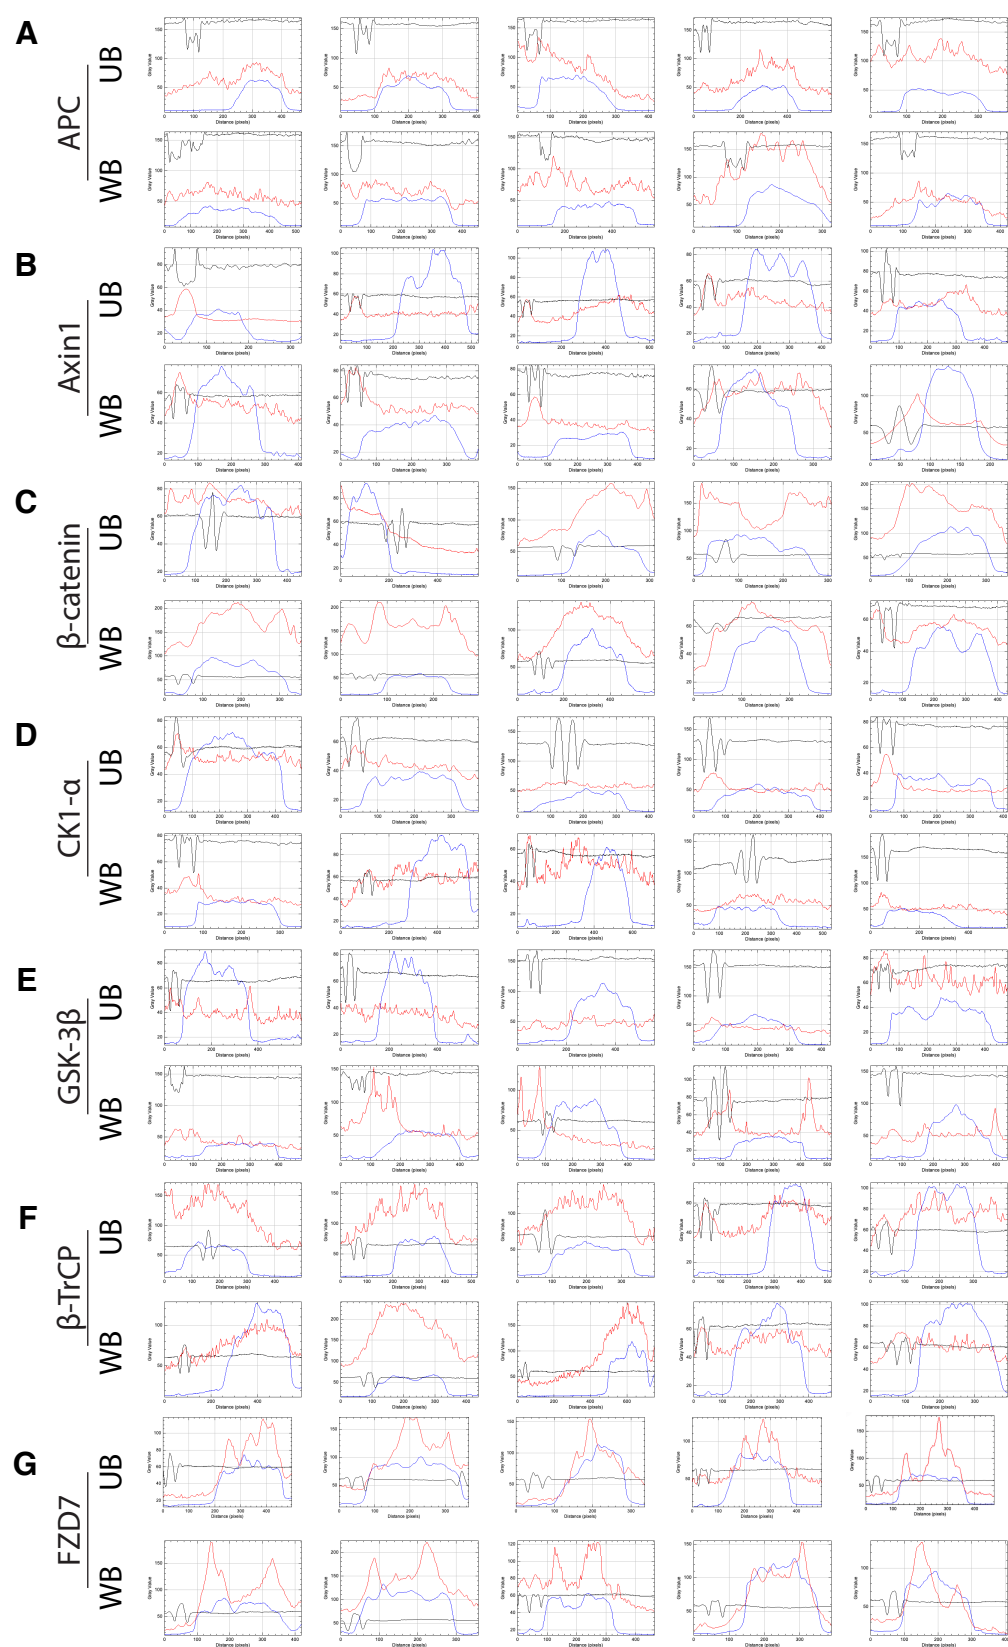

**Supplemental Fig. 3**

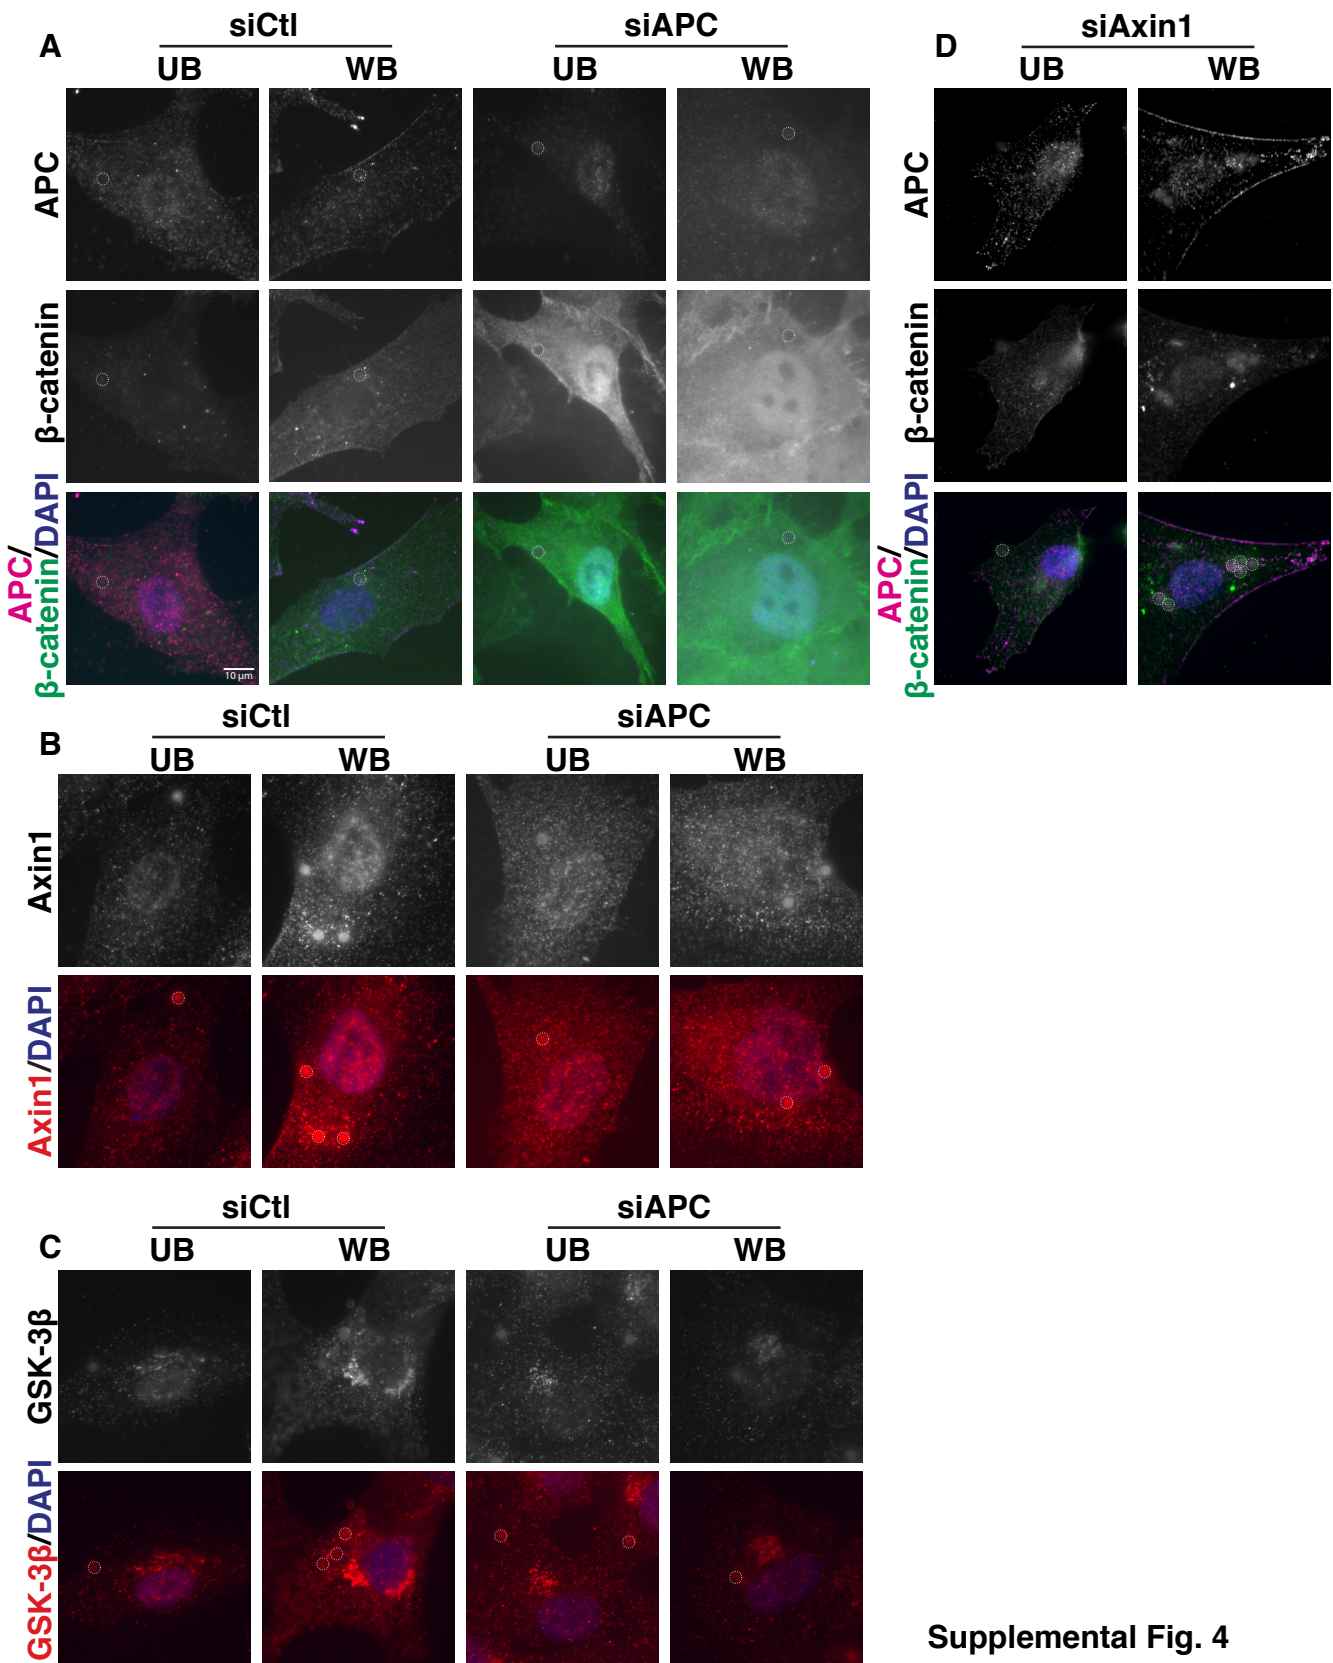

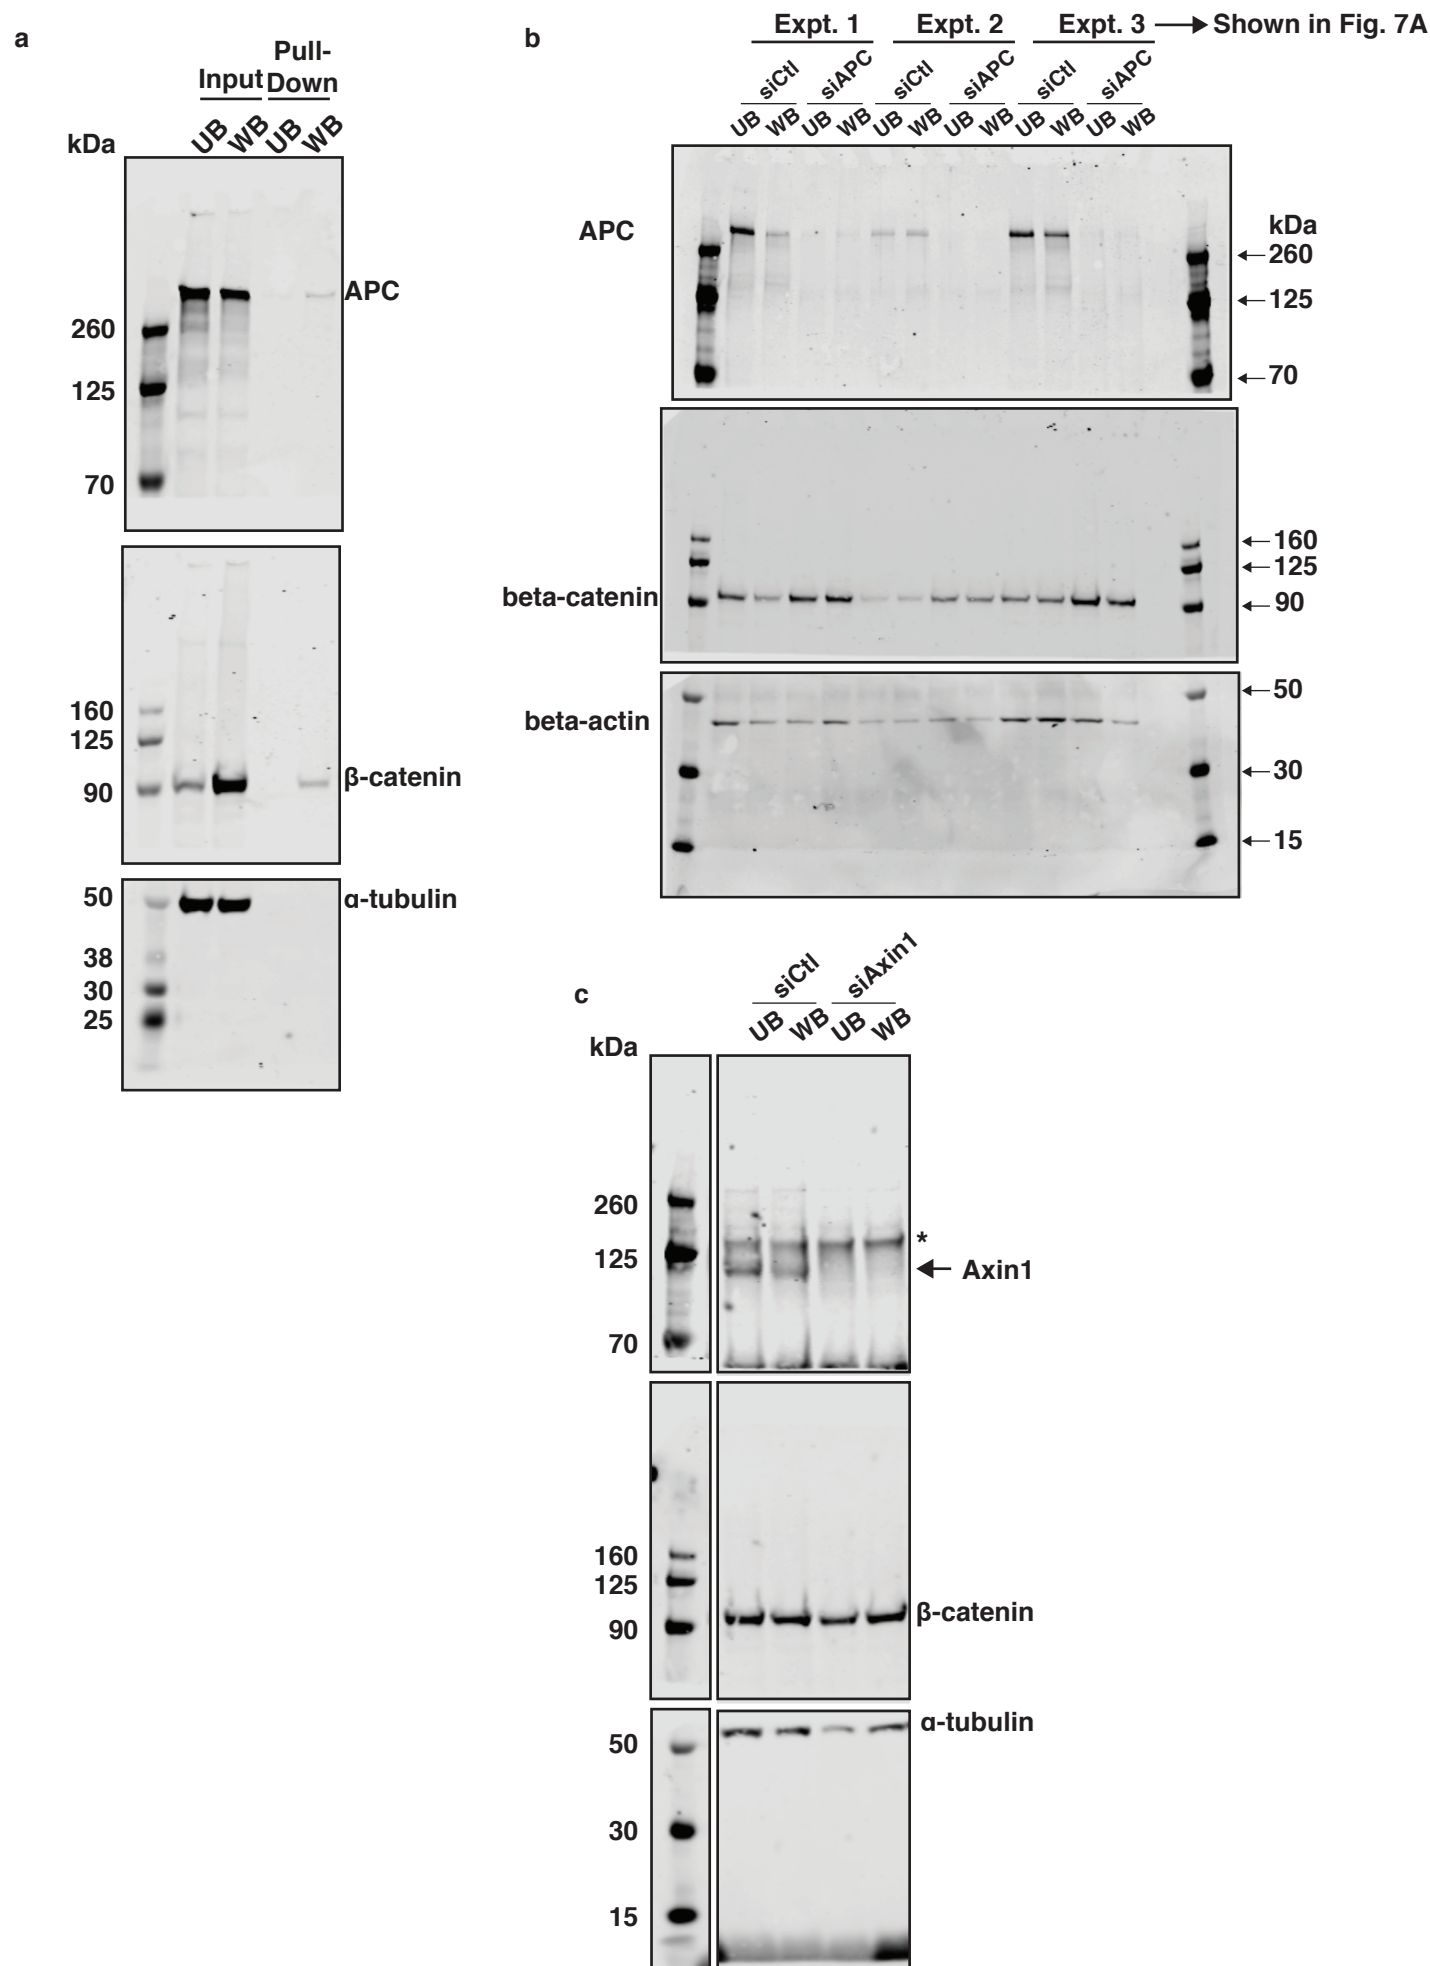

Supplemental Fig. 5
